# Supplementary material
Source: Research Square preprint supplement (doi:10.21203/rs.3.rs-9186071/v1)
Supplement: Supplementary file 1 [file ea5fb3889bb9d32339310f3c.docx]

**Supplementary Table 1. Best objective response rate to ipilimumab plus nivolumab**

| Tumor response | N=75 |
| --- | --- |
| Complete response, n (%)* | 6 (8.0%) |
| Partial response, n (%)* | 27 (36.0%) |
| Stable disease, n (%)* | 20 (26.7%) |
| Progressive disease, n (%)* | 22 (29.3%) |
| Non-CR/Non-PD, n (%) | 19 (17.4%) |
| Not evaluated, n (%) | 7 (6.3%) |
| ORR* | 44.0% |
| DCR* | 70.7% |

*In cases with target lesions.

CR, complete response; PD, progressive disease; ORR, objective response rate; DCR, disease control rate

**Supplementary Table 2. Treatment-related adverse events with ipilimumab plus nivolumab treatment**

| Event | ≥ Grade 2 | ≥ Grade 3 |
| --- | --- | --- |
| All events | 58 (52.3%) | 32 (28.8%) |
| Adrenal insufficiency | 17 (15.3%) | 11 (9.9%) |
| Hypothyroidism | 17 (15.3%) | 1 (0.9%) |
| Rash | 13 (11.7%) | 1 (0.9%) |
| AST and/or ALT elevation | 6 (5.4%) | 3 (2.7%) |
| Enterocolitis | 6 (5.4%) | 3 (2.7%) |
| Creatinine elevation | 4 (3.6%) | 2 (1.8%) |
| Drug-induced lung injury | 3 (2.7%) | 2 (1.8%) |
| Hypopituitarism | 3 (2.7%) | 3 (2.7%) |
| Hyponatremia | 3 (2.7%) | 3 (2.7%) |
| Diabetes | 2 (1.8%) | 2 (1.8%) |
| Myocarditis | 1 (0.9%) | 1 (0.9%) |

Values are given as n (%). AST, Aspartate Aminotransferase; ALT, Alanine Aminotransferase
